# Supplementary material for: Rationalization of the structural, electronic and photophysical properties of silver(i) halide n-picolylamine hybrid coordination polymers
Source: Royal Society of Chemistry journal article supplement (doi:10.1039/d4dt03003f), 2025-01-01
Supplement: d4dt03003f1.pdf [file d4dt03003f1.pdf]

# Rationalization of the structural, electronic and photophysical properties of silver(I) halide n-picolylamine hybrid coordination polymers.

Caterina Zuffa,<sup>a</sup> Daniele Veclani,<sup>b</sup> Marianna Marchini,<sup>a</sup> Filippo Monti,<sup>\*b</sup>

Chiara Cappuccino,<sup>a†</sup> Lucia Maini,<sup>\*a</sup> and Barbara Ventura<sup>b</sup>

<sup>a</sup> Università di Bologna, Dipartimento di Chimica “Giacomo Ciamician”, 40126, Bologna, Italy.

<sup>b</sup> Consiglio Nazionale delle Ricerche, Istituto per la Sintesi Organica e la Fotoreattività (CNR-ISOF),  
Via Piero Gobetti 101, 40129 Bologna, Italy.

<sup>†</sup> C.C. now at Chemistry Department, Brookhaven National Laboratory, Brookhaven, NY, USA.

## Table of Contents

|                                                        |    |
|--------------------------------------------------------|----|
| Crystallographic information .....                     | 2  |
| PXRD patterns.....                                     | 5  |
| DFT calculations .....                                 | 6  |
| Raman spectroscopy .....                               | 15 |
| Rietveld refinement.....                               | 17 |
| Thermogravimetric analysis .....                       | 18 |
| Differential Scanning Calorimetry .....                | 19 |
| Solid state absorption and emission spectroscopy ..... | 20 |

## Crystallographic information

**Table S1.** Crystal data and structure refinement for [(AgBr)(n-pica)]<sub>n</sub> coordination polymers<sup>1</sup>, reported for sake of clarity.

|                                            | [(AgBr)(2-pica)] <sub>n</sub>                    | [(AgBr)(3-pica)] <sub>n</sub>                    | [(AgBr)(4-pica)] <sub>n</sub>                    |
|--------------------------------------------|--------------------------------------------------|--------------------------------------------------|--------------------------------------------------|
| Empirical formula                          | C <sub>6</sub> H <sub>8</sub> AgBrN <sub>2</sub> | C <sub>6</sub> H <sub>8</sub> AgBrN <sub>2</sub> | C <sub>6</sub> H <sub>8</sub> AgBrN <sub>2</sub> |
| Formula weight (g mol <sup>-1</sup> )      | 295.915                                          | 295.915                                          | 295.915                                          |
| T (K)                                      | 293                                              | 293                                              | 293                                              |
| Wavelength (Å)                             | 0.71073                                          | 0.71073                                          | 1.535                                            |
| Crystal system                             | triclinic                                        | monoclinic                                       | monoclinic                                       |
| Space group                                | P-1                                              | P2 <sub>1</sub> /c                               | P2 <sub>1</sub> /c                               |
| <i>a</i> (Å)                               | 4.3871(5)                                        | 9.4518(6)                                        | 6.316(1)                                         |
| <i>b</i> (Å)                               | 10.1081(12)                                      | 6.1880(3)                                        | 7.365(1)                                         |
| <i>c</i> (Å)                               | 10.2510(18)                                      | 14.3981(9)                                       | 17.769(1)                                        |
| $\alpha$ (°)                               | 113.498(14)                                      | 90                                               | 90                                               |
| $\beta$ (°)                                | 97.081(12)                                       | 105.712(6)                                       | 81.08(1)                                         |
| $\gamma$ (°)                               | 93.535(9)                                        | 90                                               | 90                                               |
| <i>V</i> (Å <sup>3</sup> )                 | 410.63(11)                                       | 810.64(8)                                        | 816                                              |
| <i>Z</i> , <i>Z'</i>                       | 2, 1                                             | 4, 1                                             | 4, 1                                             |
| $\rho_{\text{calc}}$ (mg m <sup>-3</sup> ) | 2.393                                            | 2.425                                            | 2.407                                            |

**Table S2.** Crystal data and structure refinement for [(AgCl)(n-pica)]<sub>n</sub> coordination polymers.

|                                                                         | [(AgCl)(2-pica)] <sub>n</sub>                      | [(AgCl)(3-pica)] <sub>n</sub>                      | [(AgCl)(4-pica)] <sub>n</sub>                    |
|-------------------------------------------------------------------------|----------------------------------------------------|----------------------------------------------------|--------------------------------------------------|
| Empirical formula                                                       | C <sub>6</sub> H <sub>8</sub> AgClN <sub>2</sub>   | C <sub>6</sub> H <sub>8</sub> AgClN <sub>2</sub>   | C <sub>6</sub> H <sub>8</sub> AgClN <sub>2</sub> |
| Formula weight (g mol <sup>-1</sup> )                                   | 251.46                                             | 251.46                                             | 251.46                                           |
| T (K)                                                                   | 293                                                | 293                                                | 293                                              |
| Wavelength (Å)                                                          | 0.71073                                            | 0.71073                                            | 1.535                                            |
| Crystal system                                                          | orthorhombic                                       | monoclinic                                         | monoclinic                                       |
| Space group                                                             | P2 <sub>1</sub> 2 <sub>1</sub> 2 <sub>1</sub>      | P2 <sub>1</sub>                                    | P2 <sub>1</sub> /c                               |
| <i>a</i> (Å)                                                            | 6.5423(4)                                          | 9.2824(6)                                          | 6.186(1)                                         |
| <i>b</i> (Å)                                                            | 7.0698(5)                                          | 6.0256(3)                                          | 7.248(1)                                         |
| <i>c</i> (Å)                                                            | 17.3926(10)                                        | 7.3134(5)                                          | 17.40(1)                                         |
| $\alpha$ (°)                                                            | 90                                                 | 90                                                 | 90                                               |
| $\beta$ (°)                                                             | 90                                                 | 108.918(8)                                         | 82.05(1)                                         |
| $\gamma$ (°)                                                            | 90                                                 | 90                                                 | 90                                               |
| <i>V</i> (Å <sup>3</sup> )                                              | 804.46(9)                                          | 386.96(4)                                          | 772.62                                           |
| <i>Z</i> , <i>Z'</i>                                                    | 4, 1                                               | 2, 1                                               | 4, 1                                             |
| $\rho_{\text{calc}}$ (mg m <sup>-3</sup> )                              | 2.076                                              | 2.158                                              | 2.162                                            |
| $\mu$ (mm <sup>-1</sup> )                                               | 2.760                                              | 2.869                                              |                                                  |
| <i>F</i> (000)                                                          | 488                                                | 244                                                |                                                  |
| crystal size (mm)                                                       | 0.144x0.127x0.057                                  | 0.153x0.124x0.044                                  | powder                                           |
| $\theta$ range for data collection (°)                                  | 3.327° to 29.248°                                  | 4.102° to 28.898°                                  | 9.5° to 70°                                      |
| reflections collected                                                   | 2384                                               | 2965                                               |                                                  |
| Independent reflections                                                 | 1603                                               | 1647                                               |                                                  |
| <i>R</i> <sub>int</sub> / <i>R</i> -Bragg                               | 0.0235                                             | 0.0353                                             | 0.0114                                           |
| Completeness to theta = 25.000°                                         | 99.7%                                              | 99.6%                                              |                                                  |
| Refinement method                                                       | Full-matrix least-squares on <i>F</i> <sup>2</sup> | Full-matrix least-squares on <i>F</i> <sup>2</sup> | Rietveld                                         |
| Tmax/Tmin                                                               | 1.00000/ 0.87046                                   | 1.00000/0.91766                                    |                                                  |
| data/restraints/parameters                                              | 1603/0/91                                          | 1647/1/92                                          |                                                  |
| Goodness-of-fit on <i>F</i> <sup>2</sup>                                | 0.999                                              | 1.030                                              | 1.771                                            |
| <i>R</i> 1 [ <i>I</i> > 2 $\sigma$ ( <i>I</i> )]/ <i>R</i> <sub>p</sub> | 0.0428                                             | 0.0470                                             | 0.0317                                           |
| <i>wR</i> 2 (all data)/ <i>R</i> <sub>w</sub> <i>p</i>                  | 0.0683                                             | 0.0767                                             | 0.0437                                           |

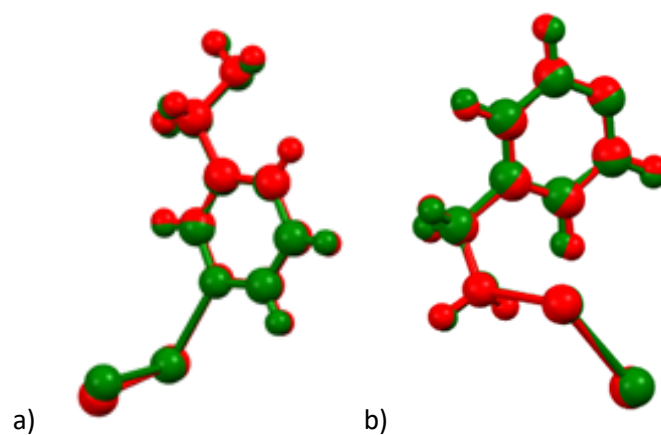

**Fig. S1** asymmetric unit overlay of a)  $[(\text{AgCl})(3\text{-pica})]_n$  and  $[(\text{AgBr})(3\text{-pica})]_n$  and b)  $[(\text{AgCl})(4\text{-pica})]_n$  and  $[(\text{AgBr})(4\text{-pica})]_n$ . The structures AgCl-based are in green, the AgBr-based ones are in red.

**Table S3.** Isostructurality parameters of  $[(\text{AgX})(3\text{-pica})]_n$  and  $[(\text{AgX})(4\text{-pica})]_n$

|        | $\pi$ | Is  | RMSD   | Max D |
|--------|-------|-----|--------|-------|
| 3-pica | 0.248 | 84% | 0.180  | 0.278 |
| 4-pica | 0.019 | 98% | 0.0995 | 0.138 |

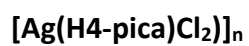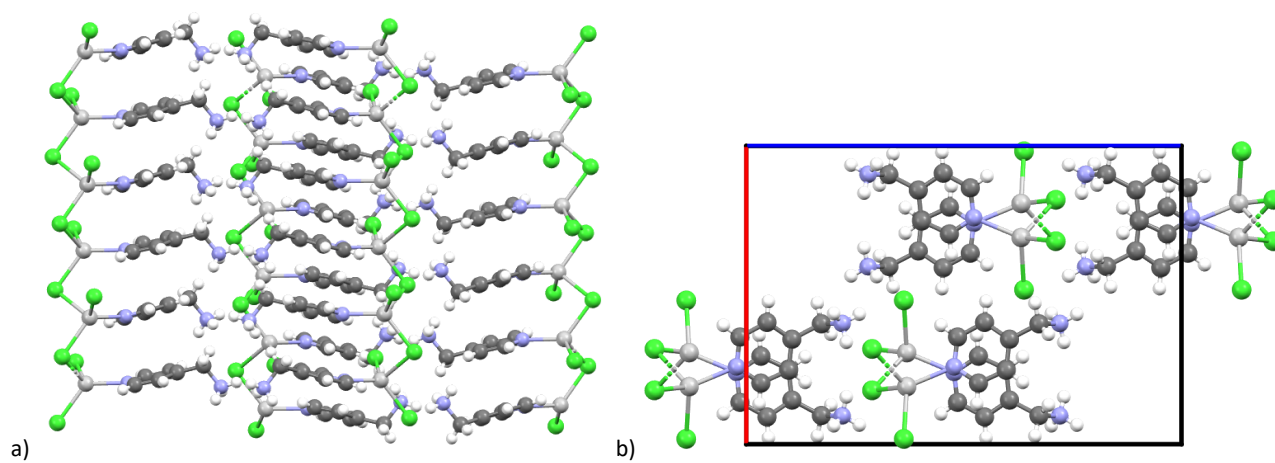

**Fig. S1** a)  $[\text{Ag}(\text{H4-pica})\text{Cl}_2]_n$  structure; b) packing along b-axis

**Table S4.** Crystal data and structure refinement for [Ag(H4-pica)Cl<sub>2</sub>]<sub>n</sub>.

|                                                   | <b>[Ag(H4-pica)Cl<sub>2</sub>]<sub>n</sub></b>                 |
|---------------------------------------------------|----------------------------------------------------------------|
| Empirical formula                                 | C <sub>6</sub> H <sub>9</sub> N <sub>2</sub> AgCl <sub>2</sub> |
| Formula weight (g mol <sup>-1</sup> )             | 287.92                                                         |
| T (K)                                             | 293                                                            |
| Wavelength (Å)                                    | 0.71073                                                        |
| Crystal system                                    | orthorhombic                                                   |
| Space group                                       | Pbca                                                           |
| <i>a</i> (Å)                                      | 13.2106(4)                                                     |
| <i>b</i> (Å)                                      | 7.0400(3)                                                      |
| <i>c</i> (Å)                                      | 19.2703(5)                                                     |
| $\alpha$ (°)                                      | 90                                                             |
| $\beta$ (°)                                       | 90                                                             |
| $\gamma$ (°)                                      | 90                                                             |
| <i>V</i> (Å <sup>3</sup> )                        | 1792.19                                                        |
| <i>Z</i> , <i>Z'</i>                              | 8, 1                                                           |
| $\rho_{\text{calc}}$ (mg m <sup>-3</sup> )        | 2.134                                                          |
| $\mu$ (mm <sup>-1</sup> )                         | 2.781                                                          |
| <i>F</i> (000)                                    | 1120                                                           |
| crystal size (mm)                                 | 0.187x0.127x0.093                                              |
| $\theta$ range for data collection (°)            | 3.445° to 29.225°                                              |
| reflections collected                             | 25352                                                          |
| Independent reflections                           | 2246                                                           |
| <i>R</i> <sub>int</sub>                           | 0.0347                                                         |
| Completeness to $\theta$ = 25.000°                | 99.8%                                                          |
| Refinement method                                 | Full-matrix least-squares on <i>F</i> <sup>2</sup>             |
| <i>T</i> <sub>max</sub> / <i>T</i> <sub>min</sub> | 1.00000/0.61123                                                |
| data/restraints/parameters                        | 2246/0/101                                                     |
| Goodness-of-fit on <i>F</i> <sup>2</sup>          | 1.147                                                          |
| <i>R</i> 1 [ <i>I</i> > 2 $\sigma$ ( <i>I</i> )]  | 0.0431                                                         |
| <i>wR</i> 2 (all data)                            | 0.0833                                                         |



## PXRD patterns

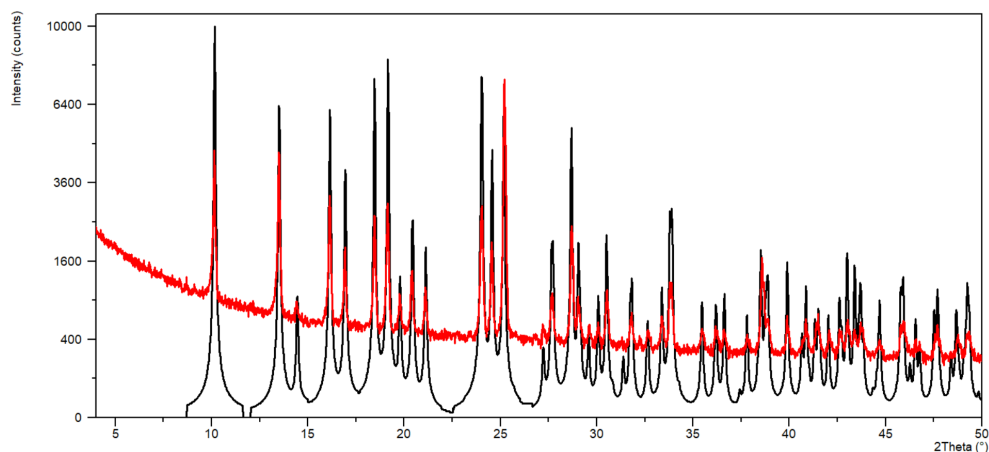

**Fig. S3** Comparison between calculated (black line) and experimental (red line) X-ray powder diffraction patterns of  $[(\text{AgCl})(2\text{-pica})]_n$ . The diffractograms are shown in square root intensity mode.

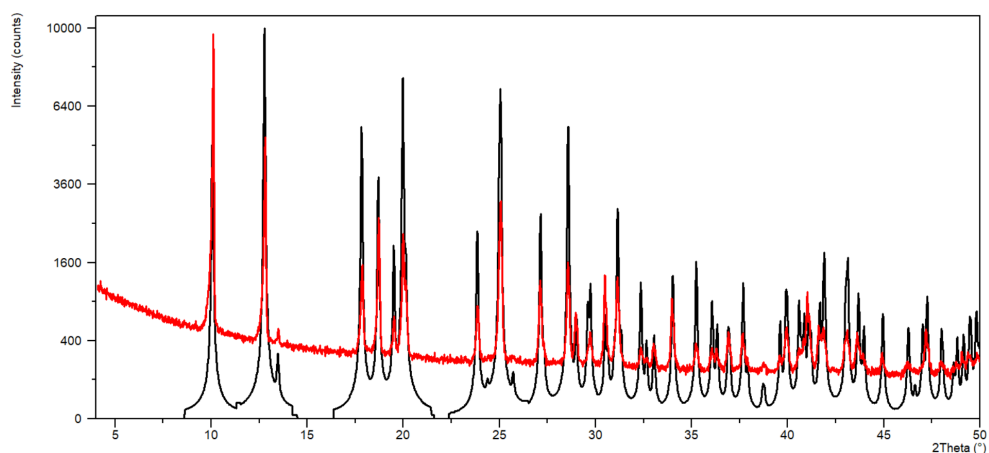

**Fig. S4** Comparison between calculated (black line) and experimental (red line) X-ray powder diffraction patterns of  $[(\text{AgCl})(3\text{-pica})]_n$ . The diffractograms are shown in square root intensity mode.

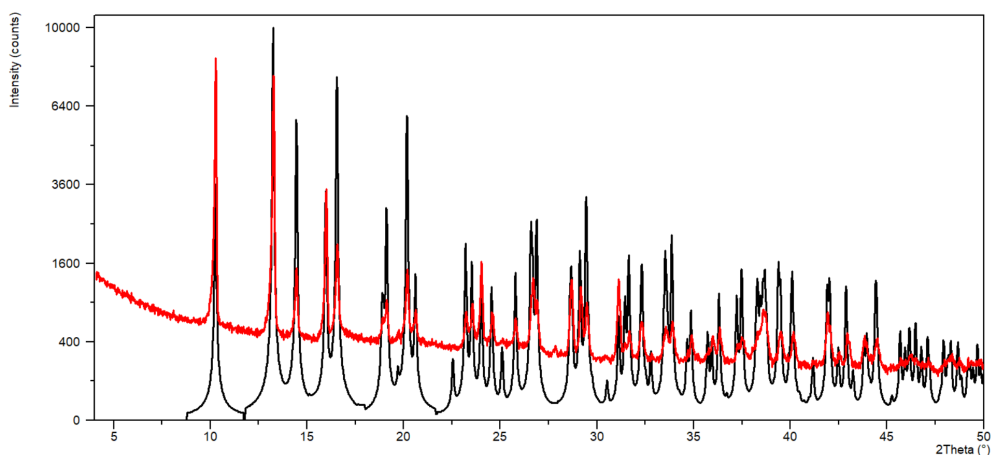

**Fig. S5** Comparison between calculated (black line) and experimental (red line) X-ray powder diffraction patterns of  $[(\text{AgCl})(4\text{-pica})]_n$ . The diffractograms are shown in square root intensity mode.

## DFT calculations

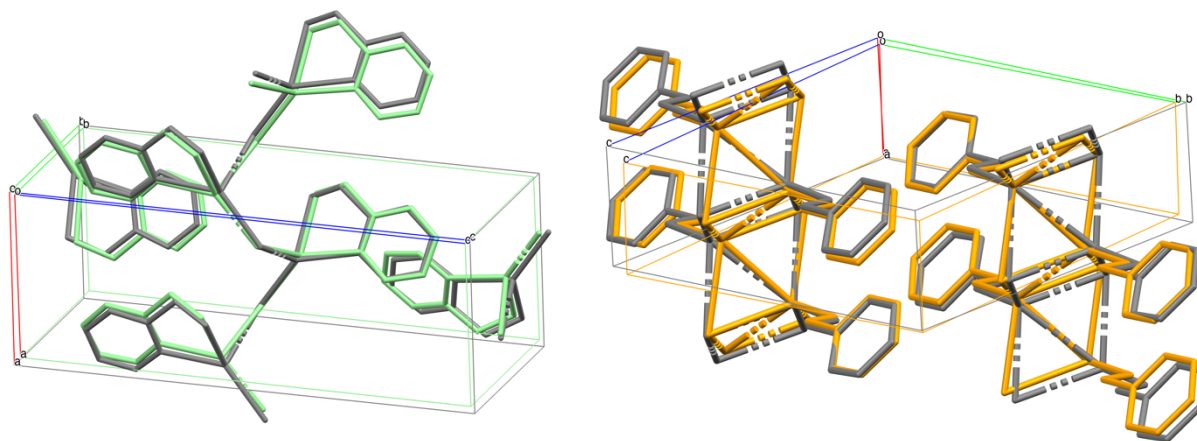

**Fig. S6** Structural overlap (obtained by maximising the superpositions of silver atoms) between experimental (gray) and DFT-optimized structures of  $[(\text{AgCl})(2\text{-pica})]_n$  (left, green) and  $[(\text{AgBr})(2\text{-pica})]_n$  (right, orange).

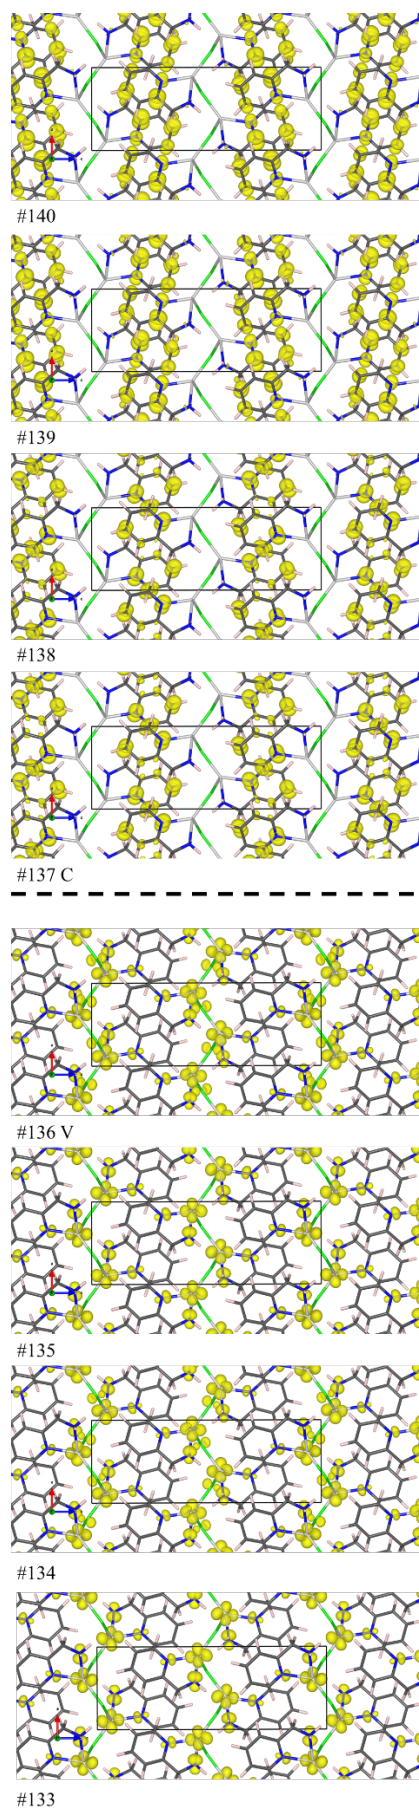

**Fig. S7** Orbital densities associated to selected wavefunctions in  $\Gamma$  reciprocal space for the highest four valence and lowest four conduction bands of  $[(\text{AgCl})(2\text{-pica})]_n$  (isosurfaces are plotted at 0.002 a.u.).

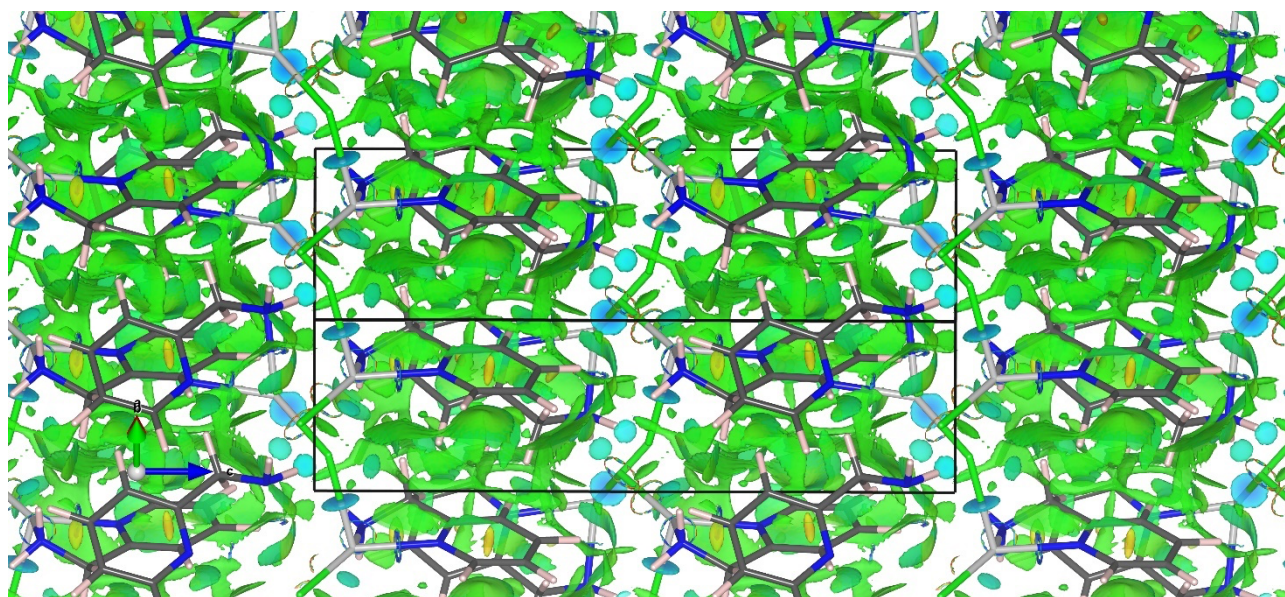

**Fig. S8** View of the  $[(\text{AgCl})(2\text{-pica})]_n$  crystal showing the reduced gradient density isosurfaces at 0.40 a.u., mapped using the product of the electron density and the second eigenvalue of the electron-density Hessian matrix (green coloured regions indicate non-covalent interactions). Interdigitated 2-pica ligands chelating different inorganic chains interact with each other *via* van-der-Waals interactions.

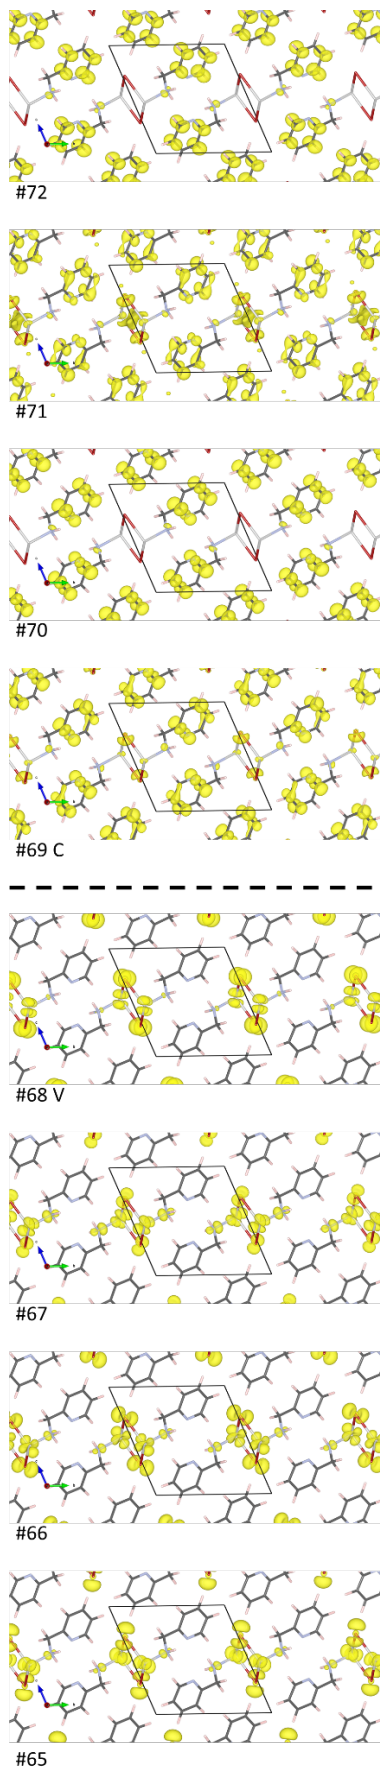

**Fig. S9** Orbital densities associated to selected wavefunctions in  $\Gamma$  reciprocal space for the highest four valence and lowest four conduction bands of  $[(\text{AgBr})(2\text{-pica})]_n$  (isosurfaces are plotted at 0.002 a.u.).



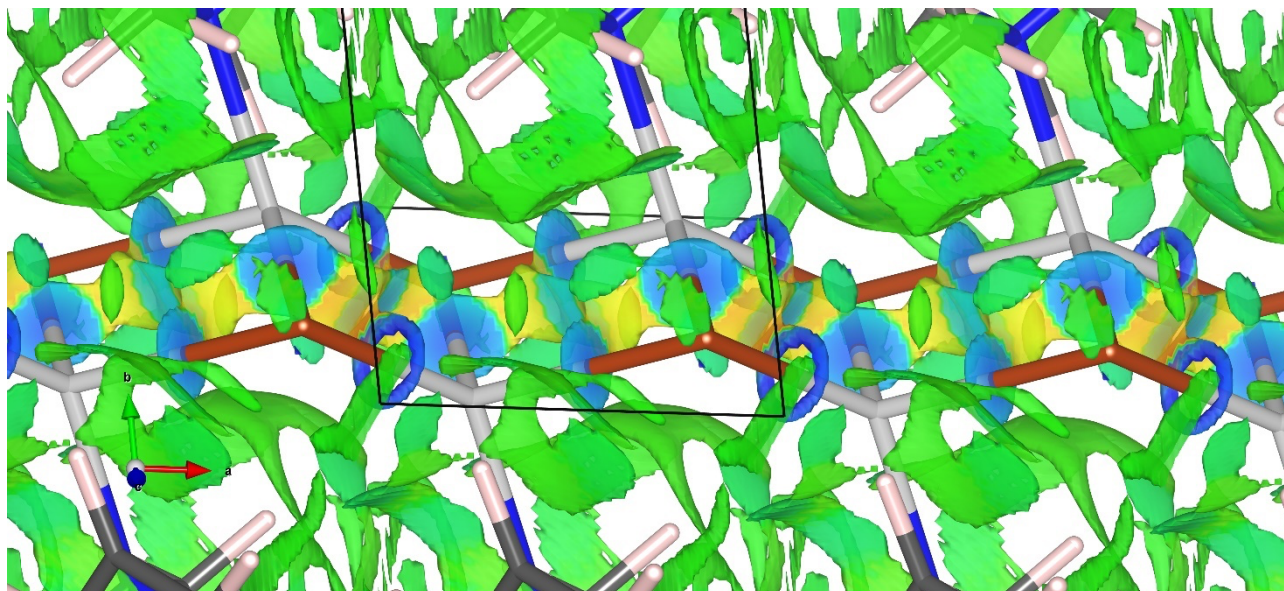

**Fig. S10** Detail of the  $[(\text{AgBr})(2\text{-pica})]_n$  inorganic double chain with reduced gradient density isosurfaces at 0.33 a.u., mapped using the product of the electron density and the second eigenvalue of the electron-density Hessian matrix (colours span from red to blue, indicating repulsive or attractive interactions, respectively). Two kinds of argentophilic interactions are clearly visible at the centre of each  $\text{Ag}_2\text{Br}_2$  ring.

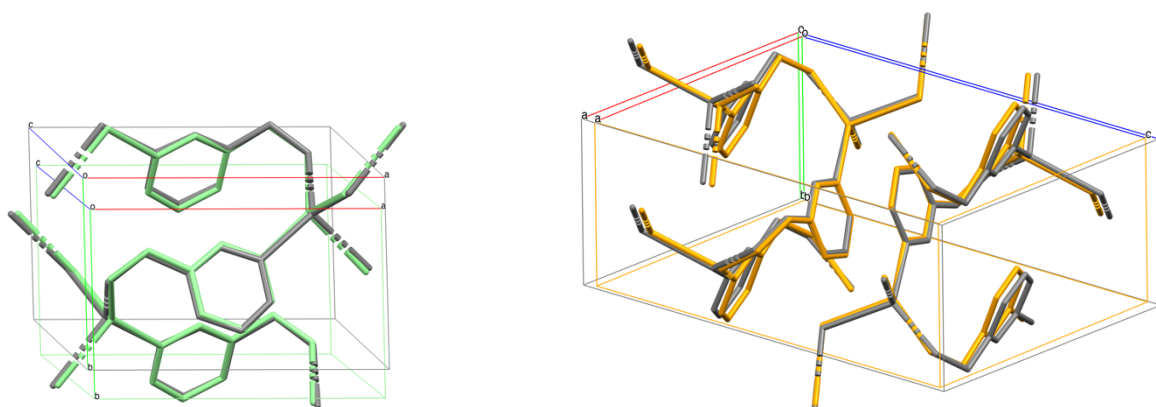

**Fig. S11** Structural overlap (obtained by maximising the superpositions of silver atoms) between experimental (gray) and DFT-optimized structures of  $[(\text{AgCl})(3\text{-pica})]_n$  (left, green) and  $[(\text{AgBr})(3\text{-pica})]_n$  (right, orange).

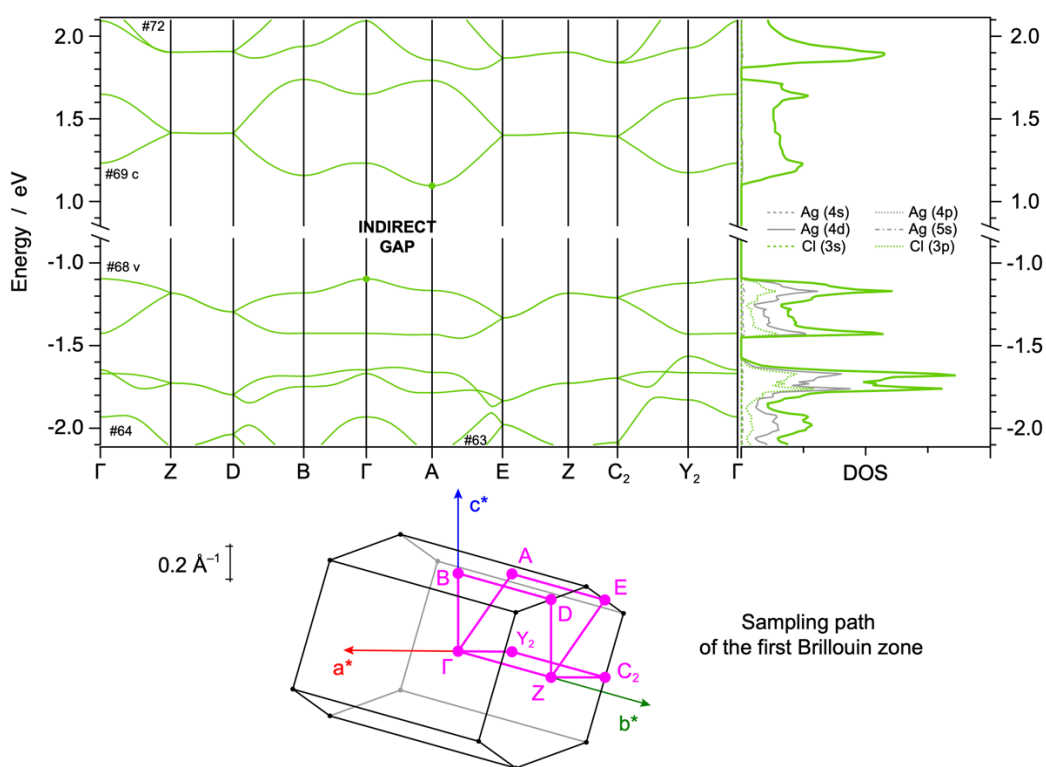

**Fig. S12** Band-structure diagram and density-of-states (DOS) plot of  $[(\text{AgCl})(3\text{-pica})]_n$  with relative orbital contributions; the band-structure path in the reciprocal space (first Brillouin zone) is also depicted. All data refer to the standard cell of  $[(\text{AgCl})(3\text{-pica})]_n$  to be compared to the  $1 \times 1 \times 2$  supercell depicted in Figure 4, main text.

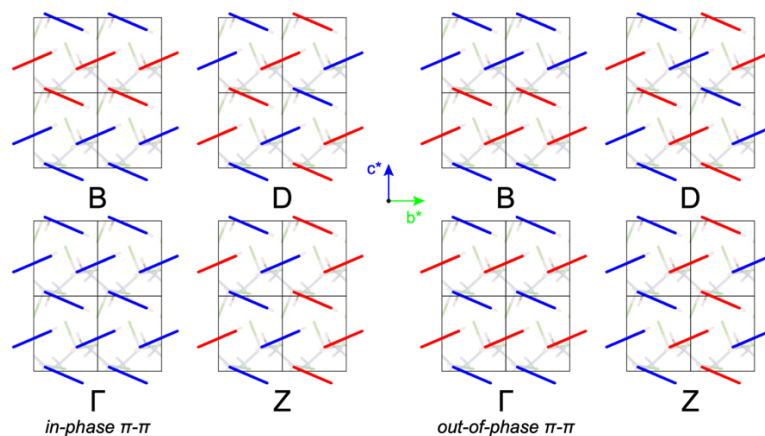

**Fig. S13** Schematic 2-D representation of the  $\pi$ -interactions along the  $bc$  plane in  $[(\text{AgCl})(3\text{-pica})]_n$ . Simplified analysis of the lowest couple of conduction bands. Each of the two bands has, as basis, the in-phase or out-of-phase combination of the same lowest  $\pi^*$  orbital centred on each of the two equivalent 3-pica ligands found in the primitive cell. For both bands, orbital contributions are sketched at  $\Gamma$ , B, Z and D  $k$ -points, showing how such bands become degenerate in Z and D. On the hand, despite in B the topological pattern is similar for both bands, no degeneracy is observed since the same kind of interaction occurs, in one case, within the same 2-D network (parallel to the  $ab$  plane) and, in the other, involving different nearby layers.

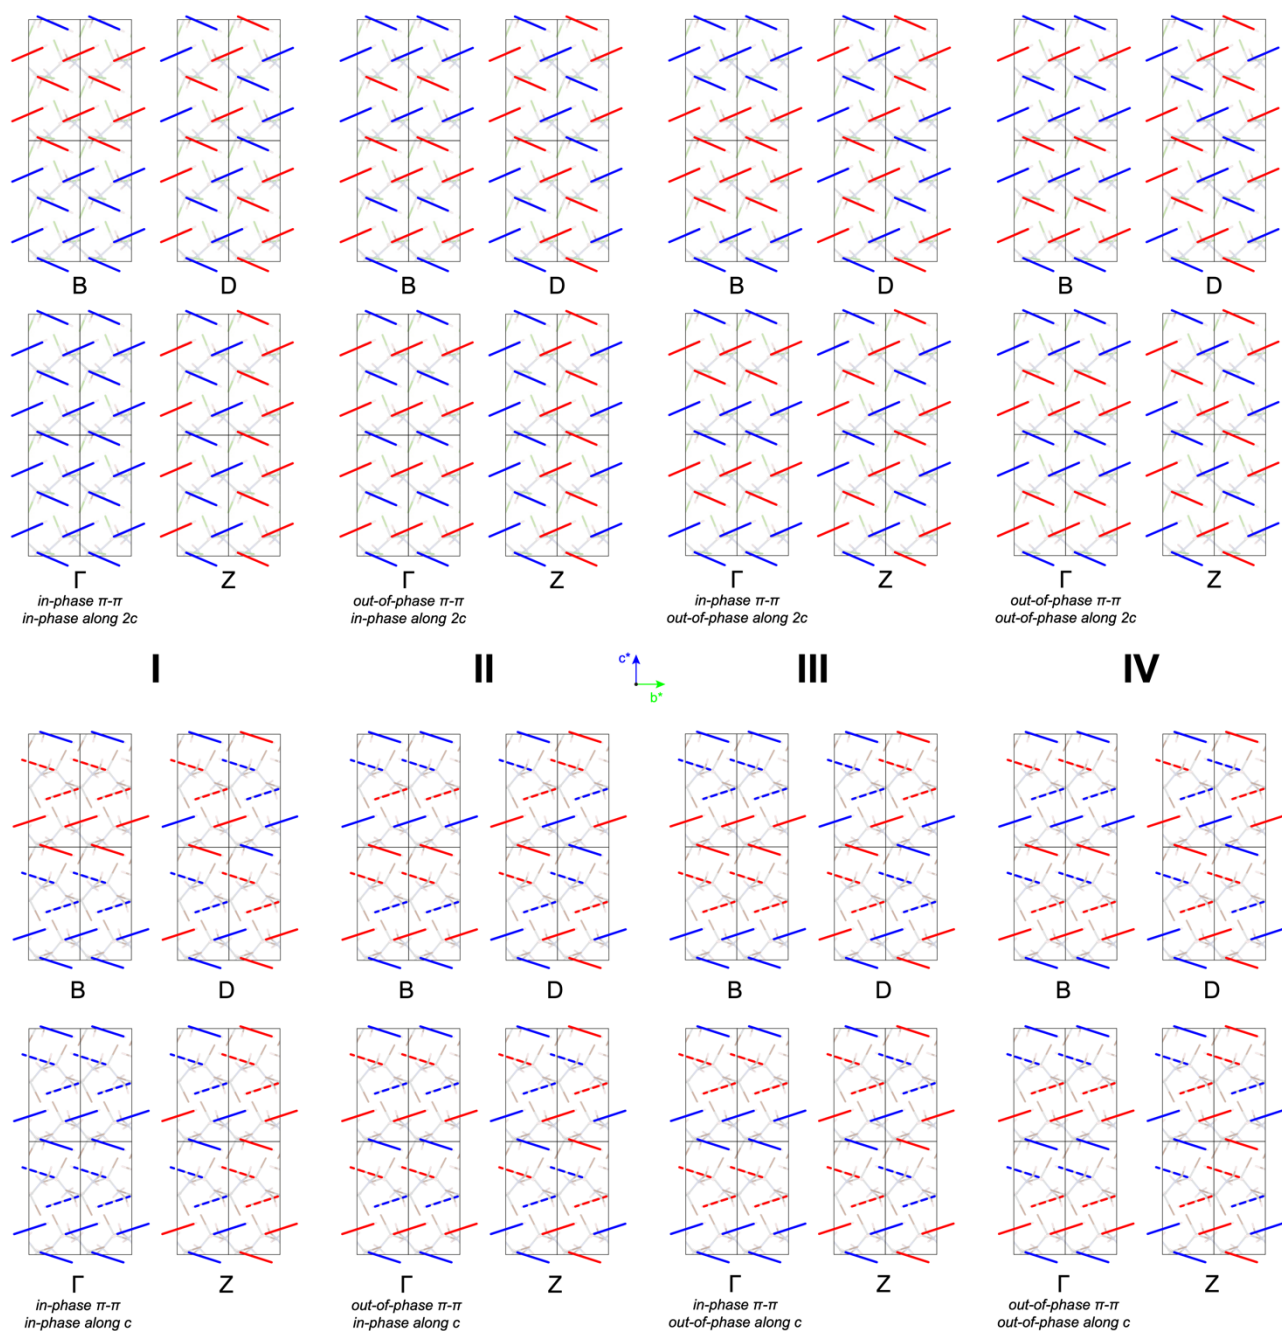

**Fig. S14** Schematic 2-D representation of the  $\pi$ -interactions along the  $bc$  plane in  $[(\text{AgCl})(3\text{-pica})]_n$  (top) and  $[(\text{AgBr})(3\text{-pica})]_n$  (bottom). For the sake of clarity, a  $1 \times 1 \times 2$  supercell is used for  $[(\text{AgCl})(3\text{-pica})]_n$  crystal and the 3-pica  $\pi$  systems belonging to the inorganic helix of opposite chirality are dashed in  $[(\text{AgBr})(3\text{-pica})]_n$ . The lowest four conduction bands (I–IV) are sketched as linear combinations of the same lowest  $\pi^*$  orbital centred on each of the two couples of 3-pica ligands found in the crystal cells; the four linear combinations are obtained by an in-phase or out-of-phase mixing within each inorganic helix and in between the two helices of the cells. For all bands, orbital contributions are sketched at  $\Gamma$ , B, Z and D  $k$ -points. In  $[(\text{AgCl})(3\text{-pica})]_n$ , all bands become degenerate in Z and D due to the presence of equivalent helices stacked along  $c$ ; the four-fold degeneracy is removed in  $[(\text{AgBr})(3\text{-pica})]_n$  since the two helices of different chirality lead to a different rearrangement of the 3-pica ligands, leading to stronger  $\pi$ – $\pi$  interactions within chains of opposite chirality (accordingly, just bands I and III are degenerate along Z–D–B, and the same occurs for II and IV).



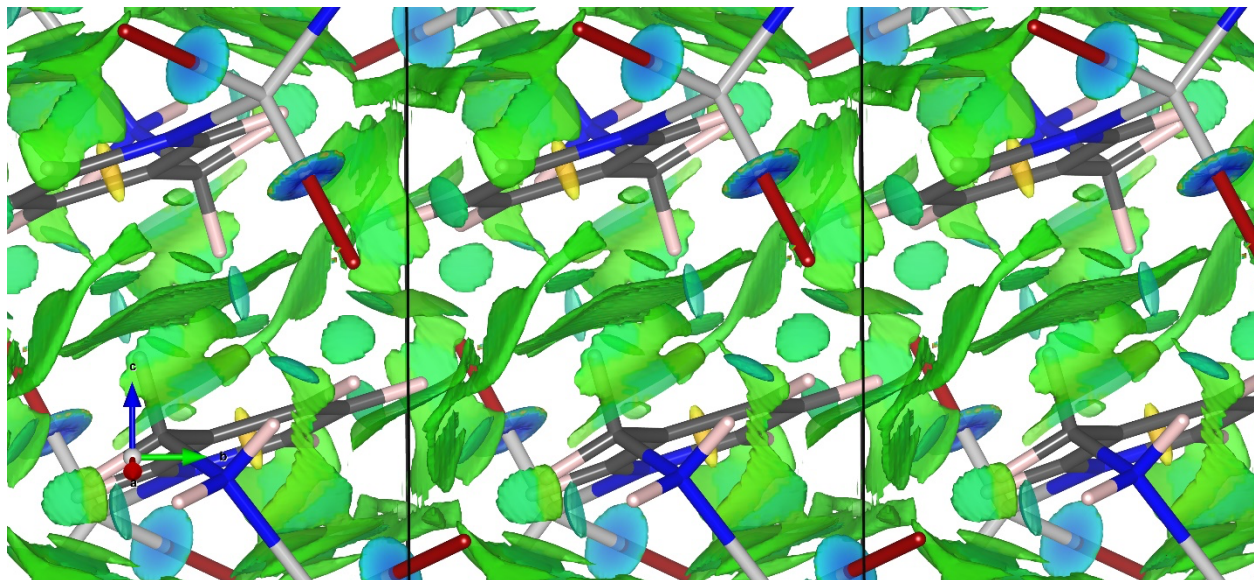

**Fig. S15** View of the  $[(\text{AgBr})(3\text{-pica})]_n$  crystal showing the reduced gradient density isosurfaces at 0.40 a.u., mapped using the product of the electron density and the second eigenvalue of the electron-density Hessian matrix (green coloured regions indicate non-covalent interactions).

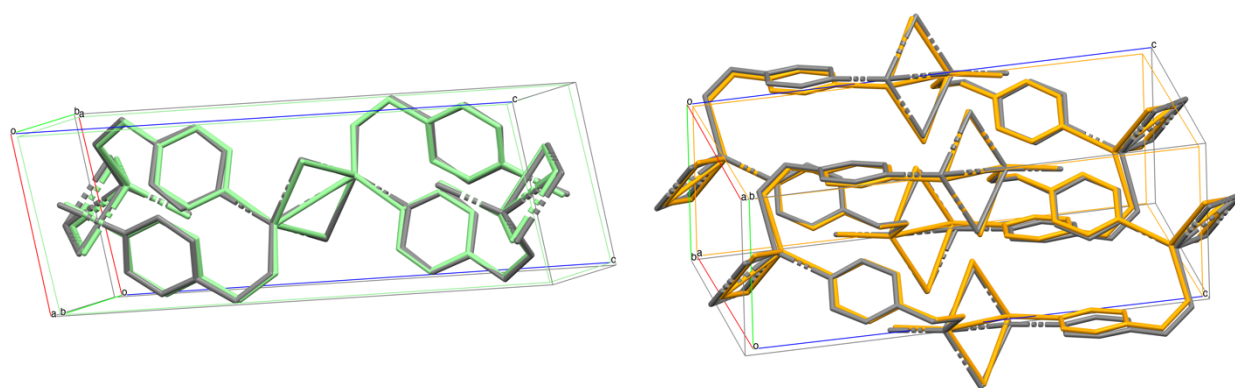

**Fig. S16** Structural overlap (obtained by maximising the superpositions of silver atoms) between experimental (gray) and DFT-optimized structures of  $[(\text{AgCl})(4\text{-pica})]_n$  (left, green) and  $[(\text{AgBr})(4\text{-pica})]_n$  (right, orange).

a)

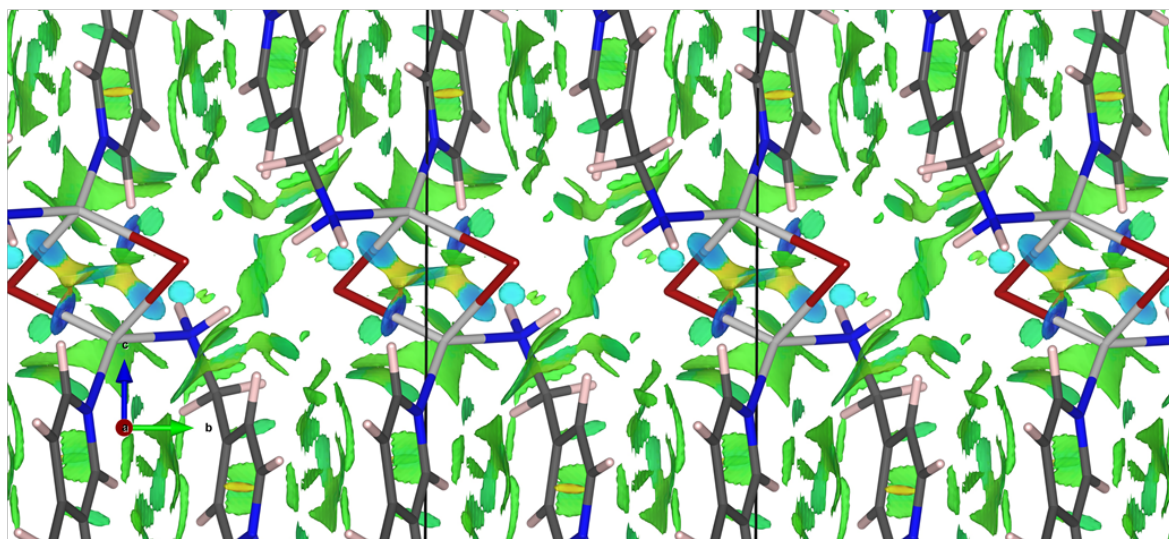

b)

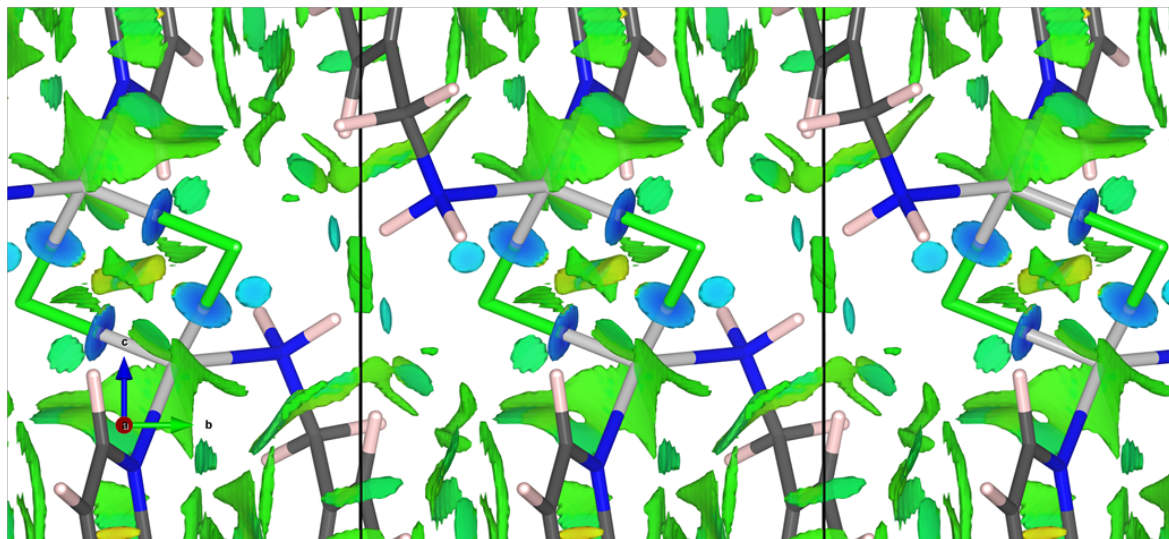

**Fig. S17** View of the  $\text{Ag}_2\text{X}_2$  unit in both a)  $[(\text{AgBr})(4\text{-pica})]_n$  and b)  $[(\text{AgCl})(4\text{-pica})]_n$  crystals along with the reduced gradient density isosurfaces at 0.33 a.u., mapped using the product of the electron density and the second eigenvalue of the electron-density Hessian matrix (colours span from red to blue, indicating repulsive or attractive interactions, respectively). The argentophilic interaction is clearly visible at the centre of each  $\text{Ag}_2\text{X}_2$  ring.

## Raman spectroscopy

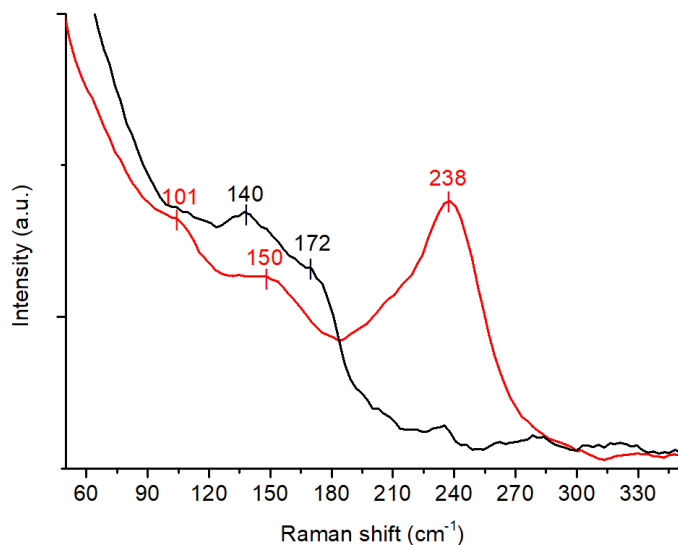

**Fig. S18** Raman spectra of AgCl (red) and AgBr (black). For AgCl, the vibrational modes at 101 and 150  $\text{cm}^{-1}$  correspond to the lattice vibrations of the silver (Ag) atoms within the crystal structure; the mode at 238  $\text{cm}^{-1}$  is associated with the stretching vibrations of the Ag-Cl bonds located at the terminal positions of the crystal structure.<sup>2</sup> In the case of AgBr, similar to what is observed in AgCl, the low-wavelength mode at 140  $\text{cm}^{-1}$  corresponds to the vibrational modes of the Ag lattice. The mode at 172  $\text{cm}^{-1}$  is associated with the stretching of the Ag-Br bonds.<sup>3</sup>

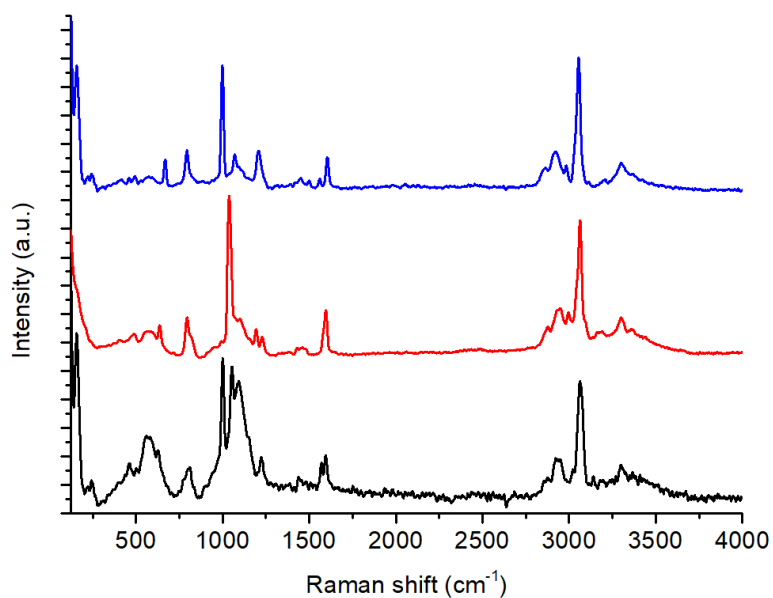

**Fig. S19** Left: Raman spectra of 2-pica (black), 3-pica (red) and 4-pica (blue).

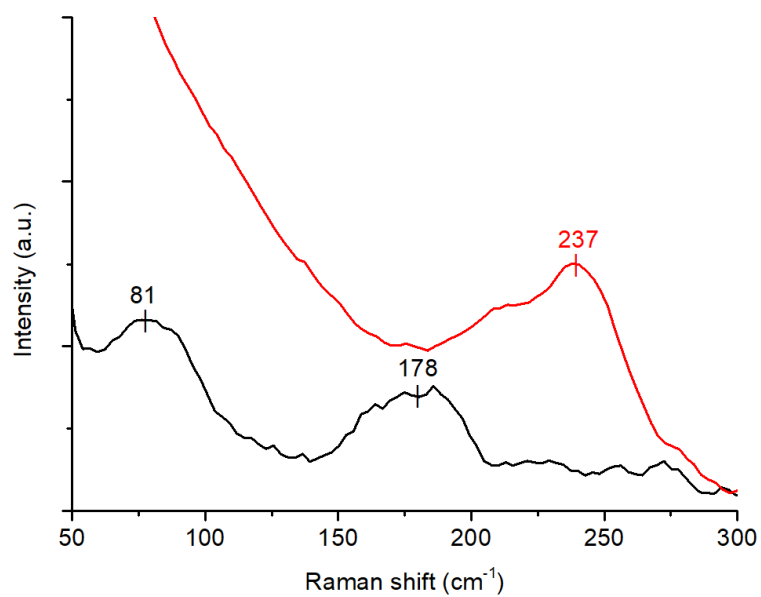

**Fig. S20** Raman spectra of  $[(\text{AgCl})(2\text{-pica})]_n$  (red) and  $[(\text{AgBr})(2\text{-pica})]_n$  (black). The band at  $81\text{ cm}^{-1}$  is ascribed to the presence of the metallophilic interactions.

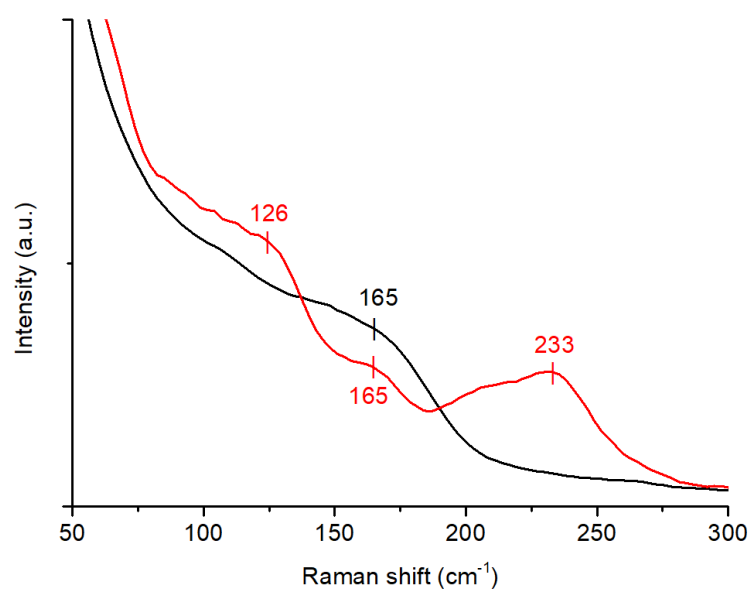

**Fig. S21** Raman spectra of  $[(\text{AgCl})(3\text{-pica})]_n$  (red) and  $[(\text{AgBr})(3\text{-pica})]_n$  (black).

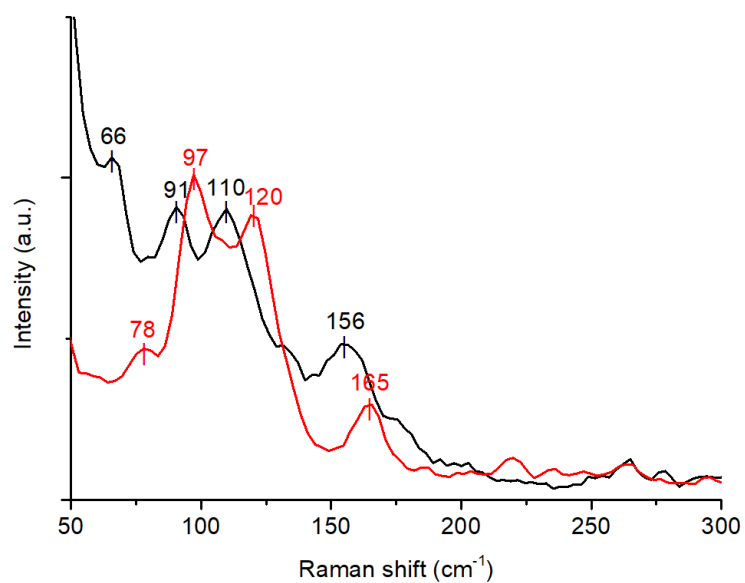

**Fig. S22** Raman spectra of  $[(\text{AgCl})(4\text{-pica})]_n$  (red) and  $[(\text{AgBr})(4\text{-pica})]_n$  (black).

## Rietveld refinement

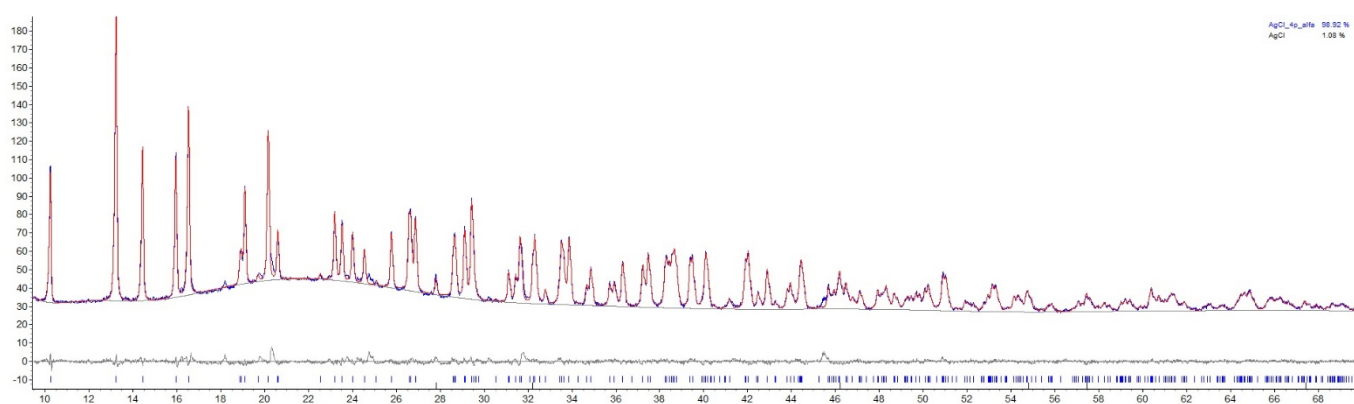

**Fig. S23** Rietveld refinement (red line) on  $[(\text{AgCl})(4\text{-pica})]_n$  diffraction pattern (blue line). Peaks of unreacted AgCl are present. In grey, the difference plot.

## Thermogravimetric analysis

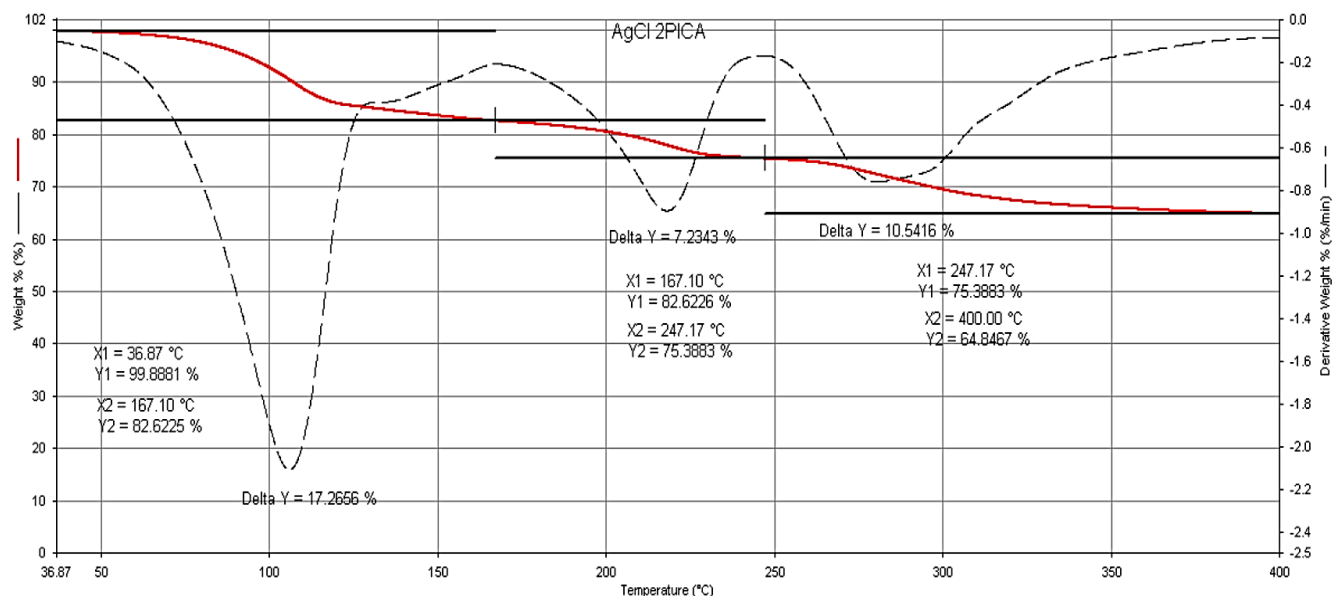

**Fig. S24** TGA analysis of  $[(\text{AgCl})(2\text{-pica})]_n$ . The partial release of 2-pica starts at temperatures higher than  $50^{\circ}\text{C}$ , while the melting point is observed at  $70^{\circ}\text{C}$ . The first weight lost ( $50^{\circ}\text{C}$ - $150^{\circ}\text{C}$ ) is ascribable only to partial release of the 2-pica. At temperatures higher than  $350^{\circ}\text{C}$  the residual weight correspond to the AgCl (analysis 65% calc. 57%, the higher experimental value could be due to the presence of unreacted AgCl).

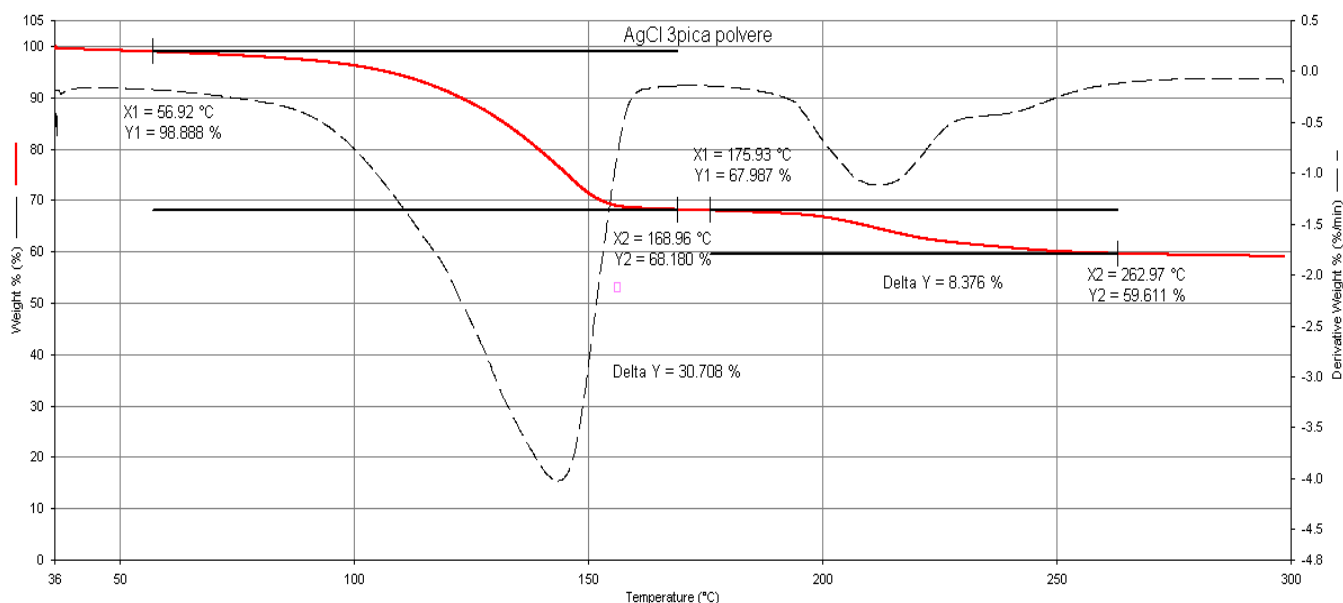

**Fig. S25** TGA analysis of  $[(\text{AgCl})(3\text{-pica})]_n$ . The weight loss can be ascribed to the loss of the 3-pica after melting (see figure S32). It is worth noting that the ligand is released in two different steps and at  $250^{\circ}\text{C}$  the residual powder is ascribable to the AgCl (analysis 60%, calc. 57%).

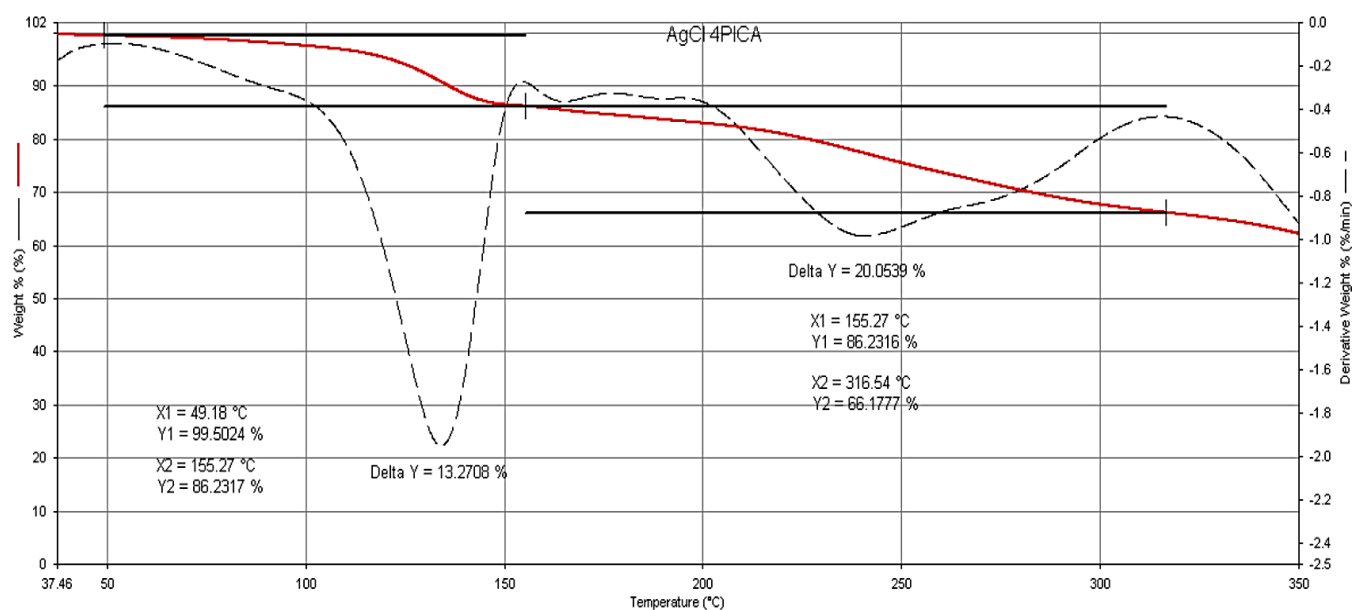

**Fig. S26** TGA analysis of  $[(\text{AgCl})(4\text{-pica})]_n$ . The first weight lost corresponds to the first endothermic peak and is ascribable to a partial release of the 4-pica. The full release of the ligand is observed at temperatures higher than  $250^{\circ}\text{C}$ .

## Differential Scanning Calorimetry

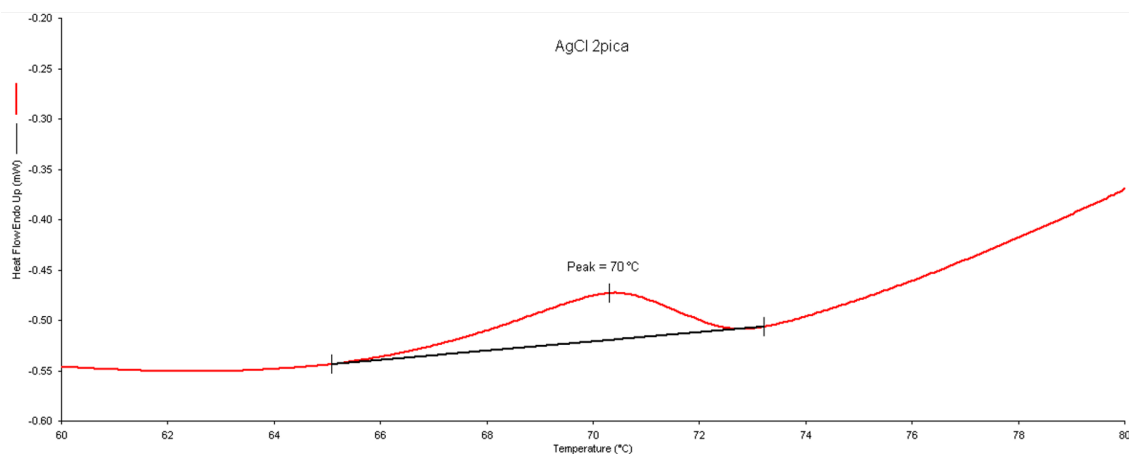

**Fig. S27** DSC analysis of  $[(\text{AgCl})(2\text{-pica})]_n$ . The endothermic peak at  $70^{\circ}\text{C}$  is due to the incongruent melting.



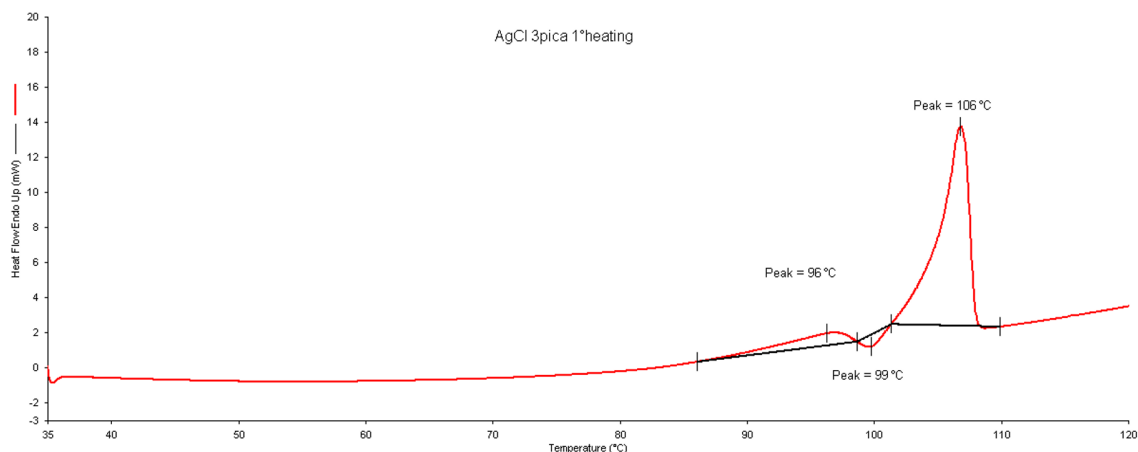

**Fig. S28** DSC analysis of  $[(\text{AgCl})(3\text{-pica})]_n$ . The endothermic peak at 96°C is followed by an exothermic peak (99°C) and then by another endothermic peak at 106°C. These events suggest a melting followed by recrystallization and a second melting peak. Further investigations are in progress to understand the thermal behaviour of  $[(\text{AgCl})(3\text{-pica})]_n$ .

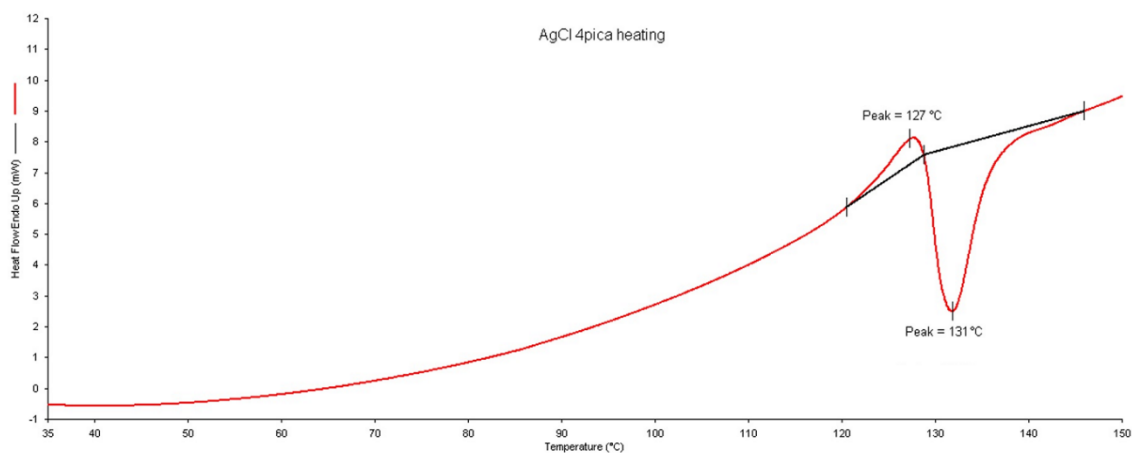

**Fig. S29** DSC analysis of  $[(\text{AgCl})(4\text{-pica})]_n$ . The endothermic peak at 127°C is followed by an exothermic peak at 131°C. Additional studies are required to fully characterize the system.

## Solid state absorption and emission spectroscopy

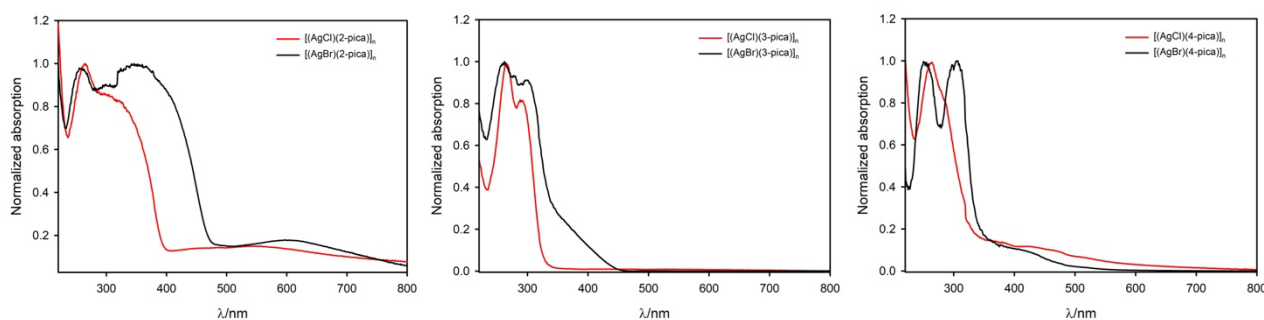

**Fig. S30** Normalized absorption spectra of polymers  $[(\text{AgX})(2\text{-pica})]_n$  (left),  $[(\text{AgX})(3\text{-pica})]_n$  (middle) and  $[(\text{AgX})(4\text{-pica})]_n$  (right), with X = Cl, Br (red and black lines respectively), as powder at room temperature. Low-energy absorption features may be due to traces of metallic silver.



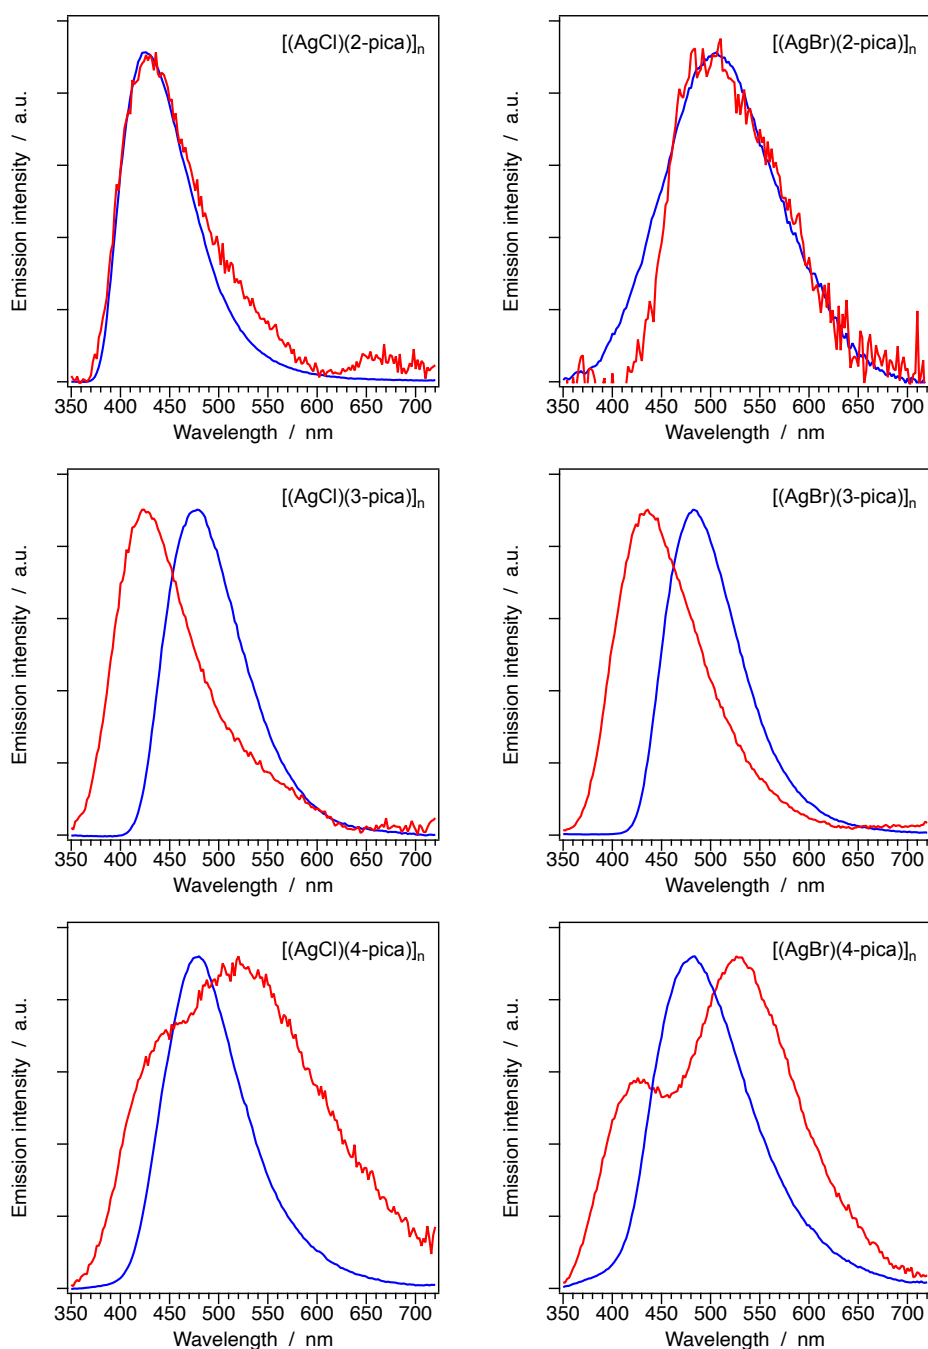

**Fig. S31** Normalized emission spectra of all the investigated samples (as powder) recorded at 77 K (blue) and 298 K (red).

- 1 C. Zuffa, C. Cappuccino, M. Marchini, L. Contini, F. Farinella and L. Maini, *Faraday Discuss.*, 2023, **241**, 448–465.
- 2 I. Martina, R. Wiesinger and M. Schreiner, *e-Preservation Sci.*, 2012, **9**, 1–8.
- 3 M. Assis, F. C. Groppo Filho, D. S. Pimentel, T. Robeldo, A. F. Gouveia, T. F. D. Castro, H. C. S. Fukushima, C. C. de Foggi, J. P. C. da Costa, R. C. Borra, J. Andrés and E. Longo, *ChemistrySelect*, 2020, **5**, 4655–4673.
